# Supplementary material
Source: Springer Nature journal article supplement (https://www.springermedizin.de/resource/supplementary/40478_2013_2_MOESM2_ESM.pdf/25657966)

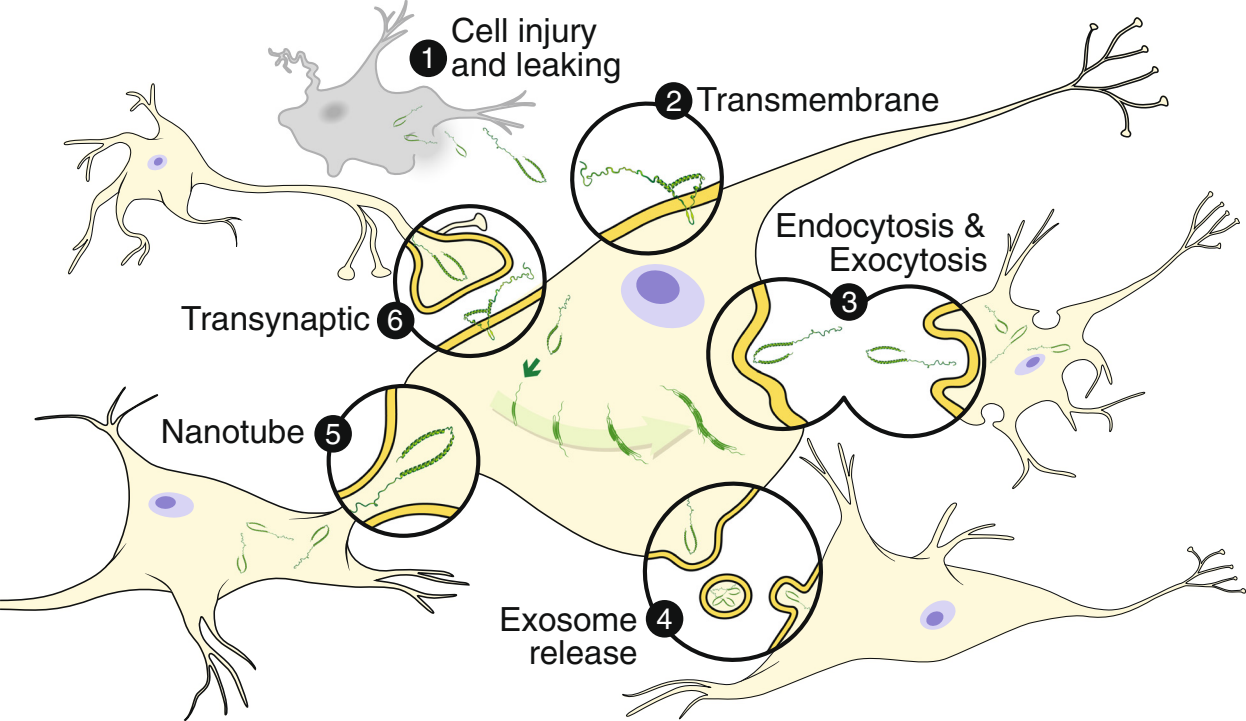

Supplement: MOESM2 [file 25657966]
